# Supplementary material for: Evaluation of RAS Mutational Status in Liquid Biopsy to Monitor Disease Progression in Metastatic Colorectal Cancer Patients
Source: MDPI journal article supplement (doi:10.3390/cells12111458), 2023-05-24
Supplement: s1 [file s1]

## SUPPLEMENTARY MATERIAL

**Evaluation of *RAS* mutational status in liquid biopsy to monitor disease progression in metastatic colorectal cancer patients**



**Supplementary Table S2a,b: Tissue and plasma NRAS, according to survival and response**

a)

| N obs=36 (with available survival data and tissue KRAS data) | Tissue NRAS |         |         |
|--------------------------------------------------------------|-------------|---------|---------|
|                                                              | WT          | Mutated | p-value |
| <b>Survived</b>                                              | 25 (69.4%)  | 0       | -       |
| <b>Deceased</b>                                              | 11 (30.6%)  | 0       |         |

  

| N obs=36 (with available survival data and plasma NRAS data) | Plasma NRAS |           |         |
|--------------------------------------------------------------|-------------|-----------|---------|
|                                                              | WT          | Mutated   | p-value |
| <b>Survived</b>                                              | 24 (70.6%)  | 1 (50.0%) | 0.524   |
| <b>Deceased</b>                                              | 10 (29.4%)  | 1 (50.0%) |         |

b)

| Response            | Tissue NRAS | Plasma NRAS |               |         |
|---------------------|-------------|-------------|---------------|---------|
|                     | WT (n=43)   | WT (n=39)   | Mutated (n=4) | p-value |
| Complete response   | 3 (7.0%)    | 2 (5.1%)    | 1 (25.0%)     | 0.274   |
| Partial response    | 4 (9.3%)    | 4 (10.3%)   | 0             |         |
| Stable disease      | 8 (18.6%)   | 8 (20.5%)   | 0             |         |
| Progressive disease | 20 (46.5%)  | 17 (43.6%)  | 3 (75.0%)     |         |
| TE                  | 8 (18.6%)   | 8 (20.5%)   | 0             |         |
